# Support for e-cigarette policies among smokers in seven European countries: longitudinal findings from the 2016–18 EUREST-PLUS ITC Europe Surveys

Janet Chung-Hall<sup>1</sup>, Geoffrey T. Fong<sup>1,2,3</sup>, Gang Meng<sup>1</sup>, Lorraine V. Craig<sup>1</sup>, Ann McNeill<sup>4</sup>, Sara C. Hitchman<sup>4</sup>, Esteve Fernández<sup>5,6,7,8</sup>, Ute Mons<sup>9</sup>, Antigona C. Trofor<sup>10,11</sup>, Krzysztof Przewoźniak<sup>12,13,14</sup>, Witold A. Zatoński<sup>12,15</sup>, Tibor Demjén<sup>16</sup>, Paraskevi A. Katsaounou<sup>17,18</sup>, Christina N. Kyriakos<sup>19,20</sup>, Constantine I. Vardavas<sup>19,20</sup>; on behalf of the EUREST-PLUS Consortium\*

- 1 Department of Psychology, University of Waterloo, Waterloo, Ontario, Canada
- 2 School of Public Health and Health Systems, University of Waterloo, Waterloo, Ontario, Canada
- 3 Ontario Institute for Cancer Research, Toronto, Ontario, Canada
- 4 Department of Addictions, King's College London, London, UK
- 5 Tobacco Control Unit, Catalan Institute of Oncology (ICO), L'Hospitalet de Llobregat, Barcelona, Catalonia, Spain
- 6 Tobacco Control Research Group, Bellvitge Biomedical Research Institute (IDIBELL), L'Hospitalet de Llobregat, Barcelona, Catalonia, Spain
- 7 School of Medicine and Health Sciences, Bellvitge Campus, Universitat de Barcelona, L'Hospitalet de Llobregat, Barcelona, Catalonia, Spain
- 8 Consortium for Biomedical Research in Respiratory Diseases (CIBER of Respiratory Diseases, CIBERES), Madrid, Spain
- 9 Cancer Prevention Unit and WHO Collaborating Centre for Tobacco Control, German Cancer Research Center (DKFZ), Heidelberg, Germany
- 10 University of Medicine and Pharmacy 'Grigore T. Popa' Iasi, Iasi, Romania
- 11 Aer Pur Romania, Bucharest, Romania
- 12 Health Promotion Foundation, Warsaw, Poland
- 13 Maria Skłodowska-Curie National Research Institute of Oncology, Warsaw, Poland
- 14 Collegium Civitas, Warsaw, Poland
- 15 European Observatory of Health Inequalities, President Stanisław Wojciechowski State University of Applied Sciences, Kalisz, Poland
- 16 Smoking or Health Hungarian Foundation, Budapest, Hungary
- 17 First ICU Evaggelismos Hospital Athens, National and Kapodistrian University of Athens, Athens, Greece
- 18 Center for Health Services Research, School of Medicine, National and Kapodistrian University of Athens, Athens, Greece
- 19 European Network for Smoking and Tobacco Prevention, Brussels, Belgium
- 20 School of Medicine, University of Crete, Heraklion, Greece

\*The members of the EUREST-PLUS Consortium are listed in the Acknowledgements section.

**Background:** The 2016 European Tobacco Products Directive (TPD) required Member States (MS) to implement new regulations for electronic cigarettes (ECs). We conducted a longitudinal study to assess changes over 2 years in smokers' support for EC policies and identify predictors of support in seven European countries after TPD implementation. **Methods:** Prospective cohort surveys were conducted among adult smokers in Germany, Greece, Hungary, Poland, Romania, Spain and England in 2016 ( $n = 9547$ ; just after TPD) and 2018 ( $n = 10\,287$ ; 2 years after TPD). Multivariable logistic regression models employing generalized estimating equations assessed changes in support for four EC policies, and tested for country differences and strength of key predictors of support. **Results:** Banning EC use in smoke-free places was supported by 53.1% in 2016 and 54.6% in 2018 with a significant increase in Greece (51.7–66.0%) and a decrease in Spain (60.1–48.6%). Restricting EC/e-liquid nicotine content was supported by 52.2 and 47.4% in 2016 and 2018, respectively, with a significant decrease in England (54.2–46.5%) and Romania (52.5–41.0%). An EC promotion ban was supported by 41.1 and 40.2%. A flavour ban was supported by 33.3% and 32.3% with a significant increase in Hungary (34.3–43.3%). Support was generally higher in Poland, Hungary and Greece vs. England. Support was lower among dual and EC-only users, and low-income smokers. **Conclusions:** Smokers in all countries strongly supported banning EC use in smoke-free places and restricting nicotine content after TPD implementation, with no clear trends for changes in policy support.

## Introduction

The popularity of electronic cigarettes (ECs) has risen dramatically since their introduction onto the global market in early 2000.<sup>1</sup> Data from the Eurobarometer surveys conducted in the European Union (EU) show that the prevalence of ever use of ECs among respondents aged 15+ years increased from 7.2% in 2012 to 11.6% in 2014, with differences between individual Member States (MS),<sup>2</sup> and that the proportion of those who have at least tried ECs increased from 12.0% in 2014 to 15.0% in 2017.<sup>3</sup> In 2016, annual

revenue from EC sales was estimated at EUR 1.3 billion and is expected to exceed EUR 10 billion by 2020.<sup>4</sup>

Comprehensive reviews of scientific evidence to date have concluded that ECs contain lower levels of toxic substances than cigarettes, and that completely switching from smoking cigarettes to e-cigarettes significantly reduces users' exposure to many of these toxicants.<sup>5–7</sup> However, there exists debate about the public health impact of inconsistent product standards for EC nicotine and chemical content,<sup>8,9</sup> the effectiveness of ECs for smoking cessation<sup>5,6,10,11</sup> and their potential role in renormalizing smoking.<sup>12</sup>

**Table 1** EC prevalence (% daily or weekly EC use) among adults and implementation of EC policies in Germany, Greece, Hungary, Poland, Romania, Spain and England as of February 2018

|         | % daily or weekly (i.e. regular) EC use, 2017 (95% CI) <sup>a</sup> | EC policies required by the TPD      |                                                 |                               | Other EC policies <sup>d-k</sup> |                         |                                |                             |
|---------|---------------------------------------------------------------------|--------------------------------------|-------------------------------------------------|-------------------------------|----------------------------------|-------------------------|--------------------------------|-----------------------------|
|         |                                                                     | 20 mg/ml nicotine limit <sup>b</sup> | 30% front and back health warnings <sup>c</sup> | Advertising and promotion ban | Comprehensive advertising ban    | Vape-free public places | Ban on characterizing flavours | Additional taxes beyond VAT |
| Germany | 1.4 (0.9–2.3)                                                       | 20 Nov 2016                          | 20 Nov 2016                                     | 20 May 2016                   | x                                | x                       | x                              | x                           |
| Greece  | 2.3 (1.5–3.6)                                                       | 20 Sept 2016                         | 20 Sept 2016                                    | 20 Sept 2016                  | x                                | 3 Aug 2010              | x                              | x                           |
| Hungary | 0.6 (0.2–1.5)                                                       | 20 May 2016                          | 20 May 2016                                     | 20 May 2016                   | 16 Aug 2016                      | 16 Aug 2016             | x                              | 0.21 tax/ml                 |
| Poland  | 0.9 (0.5–1.8)                                                       | 20 May 2016                          | 20 May 2016                                     | 20 May 2016                   | 8 Sept 2016                      | 8 Sept 2016             | x                              | 0.50 tax/ml                 |
| Romania | 0.3 (0.1–0.8)                                                       | 10 Dec 2016                          | 10 Dec 2016                                     | 10 Dec 2016                   | x                                | x                       | x                              | 0.11 tax/ml                 |
| Spain   | 1.0 (0.5–2.1)                                                       | 11 Jun 2017                          | 11 Jun 2017                                     | 19 Nov 2017                   | x                                | 11 Jun 2017             | x                              | x                           |
| England | 4.7 (3.4–6.3)                                                       | 20 May 2016 <sup>l</sup>             | 20 May 2016 <sup>l</sup>                        | 20 May 2016 <sup>m</sup>      | x                                | x                       | x                              | x                           |

- a: 2017 Eurobarometer survey data as reported in: Lavery AA, Filippidis FT, Vardavas CI. Patterns, trends and determinants of e-cigarette use in 28 European Union Member States 2014–2017. *Prev Med* 2018; 116:13–18. Prevalence for England in this table is based on 2017 survey data for the UK.
- b: Implementation of TPD provision (at TPD level) for 20 mg/ml nicotine limit was required by 20 November 2016. The sale of ECs and EC refill containers manufactured or released for free circulation prior to 20 November 2016 was permitted until 20 May 2017.
- c: Implementation of TPD provision (at TPD level) for health warnings was required by 20 November 2016.
- d: Institute for Global Tobacco Control. Country laws regulating e-cigarettes: a policy scan. Baltimore, MD: Johns Hopkins Bloomberg School of Public Health. Available at: [https://www.globaltobaccocontrol.org/e-cigarette\\_policyscan](https://www.globaltobaccocontrol.org/e-cigarette_policyscan) (12 February 2020, date last accessed).
- e: East KA, Hitchman SC, McDermott M, et al. Social norms towards smoking and electronic cigarettes among adult smokers in seven European Countries: findings from the EUREST-PLUS ITC Europe Surveys. *Tob Induc Dis* 2018; 16.
- f: Available at: [https://prawo.ug.edu.pl/sites/default/files/\\_nodes/strona-pia/33461/files/38balwicka.pdf](https://prawo.ug.edu.pl/sites/default/files/_nodes/strona-pia/33461/files/38balwicka.pdf) (31 January 2020, date last accessed).
- g: Tobacco Control Laws. Greece. Available at: <https://www.tobaccocontrolaws.org/files/live/Greece/Greece%20-%20Law%20No.%203868.pdf> (31 January 2020, date last accessed).
- h: Tobacco Control Laws. Hungary. Available at: <https://www.tobaccocontrolaws.org/legislation/country/hungary/laws> (31 January 2020, date last accessed).
- i: Tigova O, Amalia B, Castellano Y, et al. Secondhand exposure to e-cigarette aerosols among smokers: a cross-sectional study in six European countries of the EUREST-PLUS ITC Europe Surveys. *Tob Induc Dis* 2018; 16(2):11.
- j: <https://www.boe.es/boe/dias/2017/06/10/pdfs/BOE-A-2017-6585.pdf> (31 January 2020, date last accessed).
- k: Available at: <https://www.boe.es/boe/dias/2017/11/18/pdfs/BOE-A-2017-13277.pdf> (31 January 2020, date last accessed).
- l: In England, there was a 1-year transition period for the implementation of regulations for EC/e-liquid nicotine limit, and health warnings on EC product packaging.
- m: In England, bans on EC advertising on television and radio were implemented under the Tobacco and Related Products Regulations 2016, which came into force on 20 May 2016. Available at: <http://www.legislation.gov.uk/uksi/2016/507/contents/made> (31 January 2020, date last accessed).

There continues to be significant debate about how to regulate ECs in order to balance potential benefits and harms, with divergent regulatory frameworks for these products across countries.<sup>13–15</sup> Under the EU Tobacco Products Directive (TPD)<sup>16</sup>, all 28 MS were required to transpose new regulations for ECs into national law by 20 May 2016. Article 20 of the Directive sets out new rules for the harmonization of EC standards and protection of consumer health and safety. These include, among other measures: restrictions on nicotine concentration of e-liquids, child-resistant packaging, health warnings on EC product packaging and a ban on EC advertising on all broadcast media, print magazines, newspapers and periodicals, online media and some other forms of electronic media (including but not limited to commercial email and text messaging, marketers' online activities on websites and social media, paid online advertisements and social media placements and promotional marketing online). Individual MS have the option to implement additional measures, including a ban on characterizing flavours in ECs, ban on EC use in smoke-free places and minimum legal sales age laws. Table 1 provides EC prevalence rates and policy implementation dates in the seven countries of the EUREST-PLUS and International Tobacco Control Policy Evaluation (ITC) Project: Germany, Greece, Hungary, Poland, Romania, Spain and England.

Public support plays an important role for the successful implementation and enforcement of tobacco control policies.<sup>17,18</sup> Understanding public views on EC policies could help to inform policy decisions and contribute to the scientific evidence base as the debate on the potential harms and benefits of these rapidly evolving products continues. Additionally, if there is public support for

policies that are not supported by the research evidence, this would provide governments with knowledge about the possible need for public health education campaigns to address misperceptions.

To date, there are limited data on support for EC policies that could inform regulatory efforts in the EU and other countries. Studies of adult smokers in Canada,<sup>19</sup> the USA<sup>20</sup> and Hong Kong<sup>21</sup> have generally found strong support for minimum legal sales age laws for ECs, restrictions on EC product advertising and bans on EC use in smoke-free places.

This study aims to: (i) assess changes in support from 2016 to 2018 (after implementation of the TPD) among adult smokers in seven EU MS (Germany, Greece, Hungary, Poland, Romania, Spain and England) for policies to restrict EC/e-liquid nicotine content, and bans on EC promotion, EC flavours and EC use in smoke-free places and (ii) examine how demographic characteristics and smoking and EC use status are associated with EC policy support across these seven EU MS.

## Methods

### Design

This study is part of a European Commission Horizon 2020 funded project entitled 'European Regulatory Science on Tobacco: Policy Implementation to Reduce Lung Diseases (EUREST-PLUS)', which aims to evaluate the implementation of the TPD and World Health Organization Framework Convention on Tobacco Control (WHO FCTC) across the EU.<sup>22</sup>

**Table 2** ITC survey measures of EC policy support, by country

| EC policy support measure                          | ITC 6E Survey                                                                                                                               | England arm of the ITC 4CV Survey                                                                                                       |
|----------------------------------------------------|---------------------------------------------------------------------------------------------------------------------------------------------|-----------------------------------------------------------------------------------------------------------------------------------------|
| EC promotion ban                                   | (1) Do you support or oppose banning e-cigarette, vaping device and e-liquid promotions, such as free samples, coupons and price discounts? | (1) Would you support or oppose a law that bans e-cigarette and e-liquid promotions, such as free samples, coupons and price discounts? |
| Restrictions on EC/e-liquid nicotine content       | (2) Do you support or oppose limiting the amount of nicotine allowed in e-cigarettes and e-liquid?                                          | (2) Would you support or oppose a law that limits the amount of nicotine allowed in e-cigarettes and/or e-liquid?                       |
| Ban on fruit- and candy-flavoured ECs <sup>a</sup> | (3) Do you support or oppose banning fruit and candy flavours in e-cigarettes and e-liquid?                                                 | (3) Would you support or oppose a law that bans fruit and candy flavours in e-cigarettes?                                               |
| Ban on EC use in smoke-free places                 | (4) Do you support or oppose banning the use of e-cigarettes or vaping devices in places where smoking is already banned?                   | (4) Would you support or oppose a law that bans the use of e-cigarettes in places where smoking is already banned?                      |
|                                                    | Response options: strongly support; support; oppose; strongly oppose; refused; don't know                                                   | Response options: strongly support; support; oppose; strongly oppose; refused; don't know                                               |

a: Hereinafter referred to as EC flavour ban.

Data were from adult smokers aged 18+ years in seven European countries participating in the ITC Project: Germany, Greece, Hungary, Poland, Romania, and Spain [Waves 1 and 2 of the EUREST-PLUS ITC 6 European Country (6E) Survey] and England [Waves 1 and 2 of the ITC Four Country Smoking and Vaping (4CV) Survey].

The ITC Project is the first-ever international cohort study of tobacco use. A principal objective of the ITC Project is to measure the psychosocial and behavioural impact of WHO FCTC policies. To date, the ITC Project has conducted prospective cohort surveys in 29 countries, and over 160 survey waves across those 29 countries. ITC surveys in over 20 countries are designed to be nationally representative of adult smokers in each country, with sampling weights computed for all respondents and calibrated to national benchmark surveys; this is true of the seven countries whose findings are presented in this paper. More extensive details on the methodology and conceptual model of the ITC Project, including the methodology followed in these seven countries are described elsewhere.<sup>23–25</sup>

**Study population**

The ITC 6E Wave 1 (W1) sample was comprised of 6011 smokers (approximately 1000 per country; data collected from 16 June to 12 September 2016). The ITC 6E Wave 2 (W2) sample comprised the following cohorts: (i) recontact smokers and quitters who participated in Wave 1 survey (*n* = 3195) and (ii) newly recruited smokers (*n* = 2832) (data collected from 12 February to 6 May 2018). Wave 2 retention rates ranged from 36% in Hungary to 71% in Germany, with an overall retention rate of 53%. Briefly, respondents were recruited using probability sampling based on geographic strata according to the Nomenclature of Territorial Units for Statistics (NUTS) regions crossed with degree of urbanization (urban, intermediate, rural). Approximately 100 area clusters sampled in each country. Eligible households within each cluster were selected using a random walk method, and where possible up to two randomly selected smokers (one male and one female) were chosen for interviews. All interviews were conducted face-to-face using computer-assisted personal interviews (CAPI). Further details are available elsewhere.<sup>26–28</sup>

The England arm of the ITC 4CV1 sample comprised the following cohorts: (i) recontact smokers and quitters who participated in Wave 10 of the earlier 4C Project in the UK (*n* = 173) and (ii) newly recruited current smokers (*n* = 3363) (data collected from 7 July to 16 November 2016). The 4CV2 sample comprised the following cohorts: (i) recontact smokers, EC users and ex-smokers who participated in the 4CV1 survey (*n* = 1438) and (ii) newly recruited current smokers (*n* = 2822) (data collected from 21 February to 8 July 2018). The Wave 2 retention rate was 40.7%. Briefly, respondents were recruited via probability-based sampling frames, non-probability

opt-in panels or a combination of these. Respondents completed surveys on the web. Further details are available elsewhere.<sup>26,29</sup>

**Measures**

*Demographics*

Demographic variables were: sex (male, female), age (18–24, 25–39, 40–54, 55+ years), household income (low, medium, high and not stated) and education (low, medium, high and not stated).

*Smoking and EC use status*

Current smokers were defined as those who had smoked at least 100 cigarettes in their lifetime and were currently smoking cigarettes at least monthly. Current EC users were defined as those who have ever used an EC and were currently using ECs at least monthly. Respondents were categorized into four user groups: (i) cigarette-only smokers, (ii) dual users of cigarettes and ECs, (iii) EC-only users and (iv) non-users (includes ex-smokers who did not use ECs at W2 for 6E countries; includes ex-smokers who did not use ECs at W1 and W2, and less than monthly smokers for England).

*Policy support*

Support for EC policies was measured by six questions. The wording and response options for some measures differed between countries (see table 2). For all policy support measures across all countries, responses were dichotomized as ‘strongly support/support’ and ‘oppose/strongly oppose/don’t know’. Response ‘refused’ was excluded.

*Statistical analysis*

To examine cross-country differences and changes in overall support for each of the four EC policies among smokers, the following respondents across all seven countries were included in the analysis: (i) smokers at Wave 1, (ii) smokers at Wave 1 who were recontacted at Wave 2 (includes those who were still smoking and those who quit smoking at Wave 2) and (iii) newly replenished smokers at Wave 2 (to maintain the sample sizes and estimation power). Only respondents who had heard of ECs were included in the analysis.

To ensure that prevalence estimations were comparable at the same levels of the control variables, all data were pooled to estimate prevalence of support for each of the four EC policies. The rescaled cross-sectional weights at recruitment were applied to each respondent to ensure comparability of the between-wave data at the individual-level for the recontacted samples. Accordingly, Wave 1 estimates of the outcome variables were generated for all Wave 1 smokers and the Wave 2 estimates of those variables were the average of the estimates for the Wave 1 and Wave 2 smokers. Therefore, Wave 2 is not a purely cross-sectional estimation of the population

at the time of the Wave 2 Survey. However, we used this weighting method to maximize the comparability of the Wave 1 and Wave 2 data for examining any potential changes in EC policy support.

Thus, the constructed analytic data ensured that: (i) the estimates of EC policy support for each country were comparable since they represent the prevalence of each country at the average levels of the controlling variables of all seven countries and (ii) the Wave 1 and 2 estimates within each country are comparable, allowing for an appropriate analysis to assess changes in policy support over time.

Estimates were produced using longitudinal logistic regression models incorporating generalized estimating equations (GEE).<sup>30</sup> For prevalence estimation, in addition to country, wave and their interaction terms, the models also adjusted for sex, age, income, education, smoking and EC use status and time in sample (number of times respondents had been surveyed in each of the countries). Parameter estimations from these models were then provided to examine the potential associations between demographic characteristics, smoking and EC use status and support for each of the four policies. In addition to the country and wave interaction, we also tested interactions between country and other covariates to identify potential country-specific associations. There were only minor differences in a couple of countries, so the results without these interaction terms will be presented here for simplicity.

To address a potential design effect resulting from the complex survey design and within-individual correlations due to repeated measures at each wave, a nested structure that includes the strata, the primary sampling units and the respondent IDs was used to construct the models. All the analyses were conducted using SAS-callable SUDAAN (V.11). The predicted marginal standardization method in the SUDAAN GEE model (PREDMARG) was used for estimating prevalence.<sup>31</sup> General linear contrasts of the predicted marginals in the corresponding models were specified to test the significance of between-wave percent changes. Logistic regression results are presented as adjusted odds ratios (aOR), with all confidence intervals (CIs) and statistical significance tested at the 95% confidence level.

An additional validation analysis based on longitudinal data from smokers who participated at both survey waves was conducted to examine whether there were any individual-level changes in policy support over time and whether individual-level changes were different than the population estimates in the main analyses above. Results of the individual-level analysis are not presented here, as there were no significant differences in changes to the main estimates and changes in policy support over time.

## Results

Table 3 presents the sample characteristics, by survey wave. At both waves, most respondents were from England, aged 25 years and older and of medium income and educational level. The vast majority of respondents were cigarette-only smokers.

### Trends in EC policy support

#### Overall policy support

Across all countries, overall support was highest for policies to ban EC use in smoke-free places (W1: 53.1%, W2: 54.6%) and to restrict EC nicotine content (W1: 52.2%, W2: 47.4%), followed by EC promotion ban (W1: 41.1%, W2: 40.2%) and lowest for an EC flavour ban (W1: 33.3%, W2: 32.3%). There were no consistent patterns for changes in support over time for each of the four EC policies across all countries.

#### Ban on EC use in smoke-free places

Support for a ban on EC use in smoke-free places ranged from 51.2% in Hungary to 60.1% in Spain at W1 and 46.4% in Romania to 66.0% in Greece at W2. Support increased significantly

**Table 3** Sample characteristics

|                           | Wave 1          |         | Wave 2            |         |
|---------------------------|-----------------|---------|-------------------|---------|
|                           | <i>n</i> = 9547 |         | <i>n</i> = 10 287 |         |
|                           | <i>N</i>        | Percent | <i>N</i>          | Percent |
| Country                   |                 |         |                   |         |
| Germany                   | 1003            | 10.5    | 1010              | 9.8     |
| Greece                    | 1000            | 10.5    | 1010              | 9.8     |
| Hungary                   | 1000            | 10.5    | 1000              | 9.7     |
| Poland                    | 1006            | 10.5    | 996               | 9.7     |
| Romania                   | 1001            | 10.5    | 1003              | 9.8     |
| Spain                     | 1001            | 10.5    | 1008              | 9.8     |
| England                   | 3536            | 37.0    | 4260              | 41.4    |
| Sex                       |                 |         |                   |         |
| Male                      | 5132            | 53.8    | 5247              | 51.0    |
| Female                    | 4415            | 46.2    | 5040              | 49.0    |
| Age group (years)         |                 |         |                   |         |
| 18–24                     | 1312            | 13.7    | 1505              | 14.6    |
| 25–39                     | 2645            | 27.7    | 2615              | 25.4    |
| 40–54                     | 2942            | 30.8    | 3167              | 30.8    |
| 55+                       | 2648            | 27.7    | 3000              | 29.2    |
| Income                    |                 |         |                   |         |
| Low                       | 2109            | 22.1    | 2071              | 20.1    |
| Medium                    | 3804            | 39.8    | 3869              | 37.6    |
| High                      | 1966            | 20.6    | 2399              | 23.3    |
| Not stated                | 1668            | 17.5    | 1948              | 18.9    |
| Education                 |                 |         |                   |         |
| Low                       | 3221            | 33.7    | 3159              | 30.7    |
| Medium                    | 4508            | 47.2    | 5076              | 49.3    |
| High                      | 1714            | 18.0    | 1946              | 18.9    |
| Not stated                | 104             | 1.1     | 106               | 1.0     |
| Smoking and EC use status |                 |         |                   |         |
| Cigarette-only smoker     | 8288            | 86.8    | 7774              | 75.6    |
| Dual user                 | 1259            | 13.2    | 1921              | 18.7    |
| EC-only user              | 0               | 0.0     | 98                | 1.0     |
| Non-user                  | 0               | 0.0     | 494               | 4.8     |

from W1 to W2 in Greece (51.7–66.0%) and decreased in Spain (60.1–48.6%). There were no significant changes in support in all other countries (figure 1).

### Restrictions on EC/e-liquid nicotine content

Support for restrictions on EC nicotine content ranged from 43.2% in Germany to 56.8% in Poland at W1 and 41.0% in Romania to 57.2% in Hungary at W2. Support decreased significantly from W1 to W2 in England (54.2–46.5%) and Romania (52.5–41.0%). There were no significant changes in support in all other countries (figure 2).

### EC promotion ban

Support for an EC promotion ban ranged from 35.7% in England to 55.1% in Poland at W1 and 32.9% in Spain to 57.0% in Poland at W2. There were no significant changes in support by country (figure 3).

### EC flavour ban

Support for an EC flavour ban ranged from 27.3% in Greece to 45.3% in Romania at W1 and 24.1% in Spain to 43.3% in Hungary at W2. Support increased significantly from W1 to W2 in Hungary (34.3–43.3%). There were no significant changes in support in all other countries (figure 4).

### Predictors of EC policy support

Table 4 presents the results of the weighted multivariate logistic regression models that tested differences in support for each of the four EC policies by survey wave, country, sex, age, income,



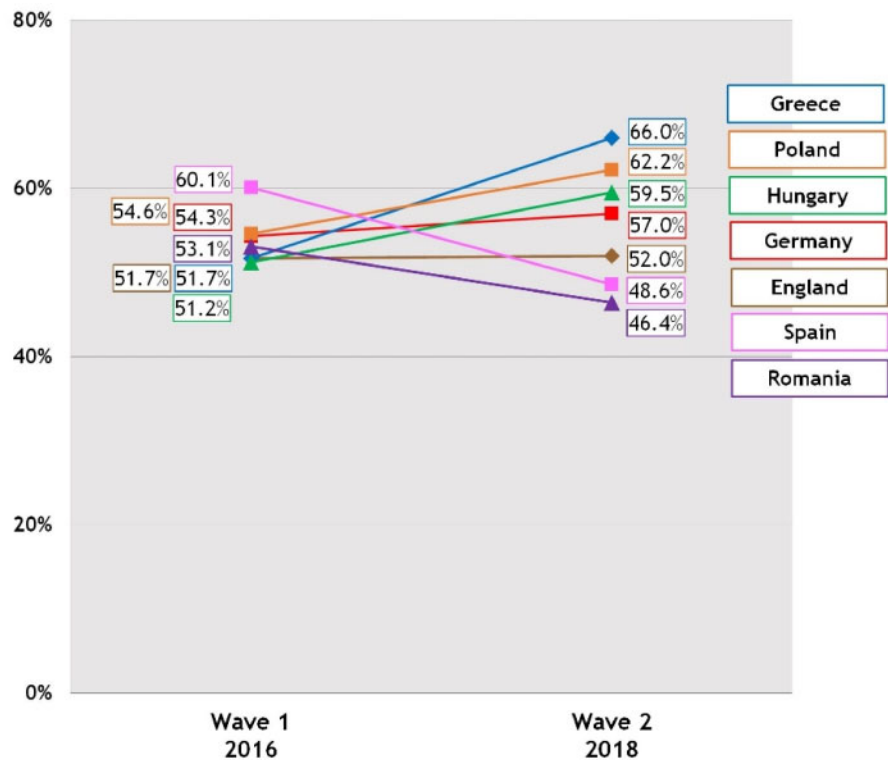

**Figure 1** Percentage of smokers<sup>†</sup> who would ‘support’ or ‘strongly support’ a law that bans the use of ECs in places where smoking is already banned, by country and survey wave. <sup>†</sup>Among those who have heard of e-cigarettes

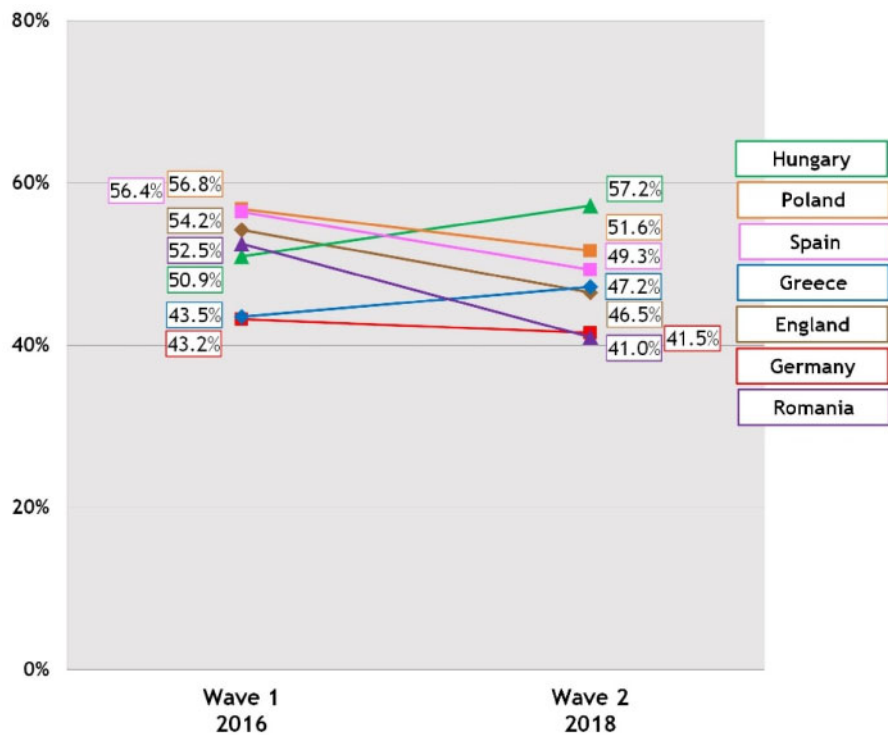

**Figure 2** Percentage of smokers<sup>†</sup> who would ‘support’ or ‘strongly support’ a law that limits the amount of nicotine in ECs and e-liquid, by country and survey wave. <sup>†</sup>Among those who have heard of e-cigarettes

education and smoking and EC use status. Overall, country, income and smoking and EC use status were significantly associated with support for all four EC policies.

Smokers in Poland were generally more likely to support EC policies compared with those in England, with statistically significant differences in support for a ban on EC use in smoke-free places,

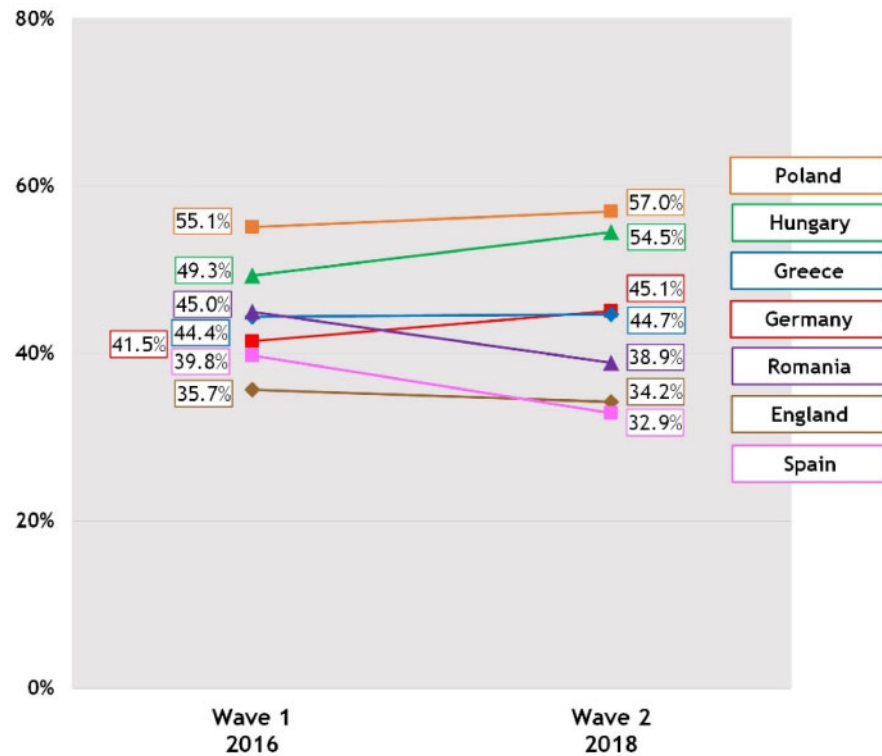

**Figure 3** Percentage of smokers<sup>†</sup> who would 'support' or 'strongly support' a law that bans EC and e-liquid promotions, by country and survey wave. <sup>a</sup>Among those who have heard of e-cigarettes

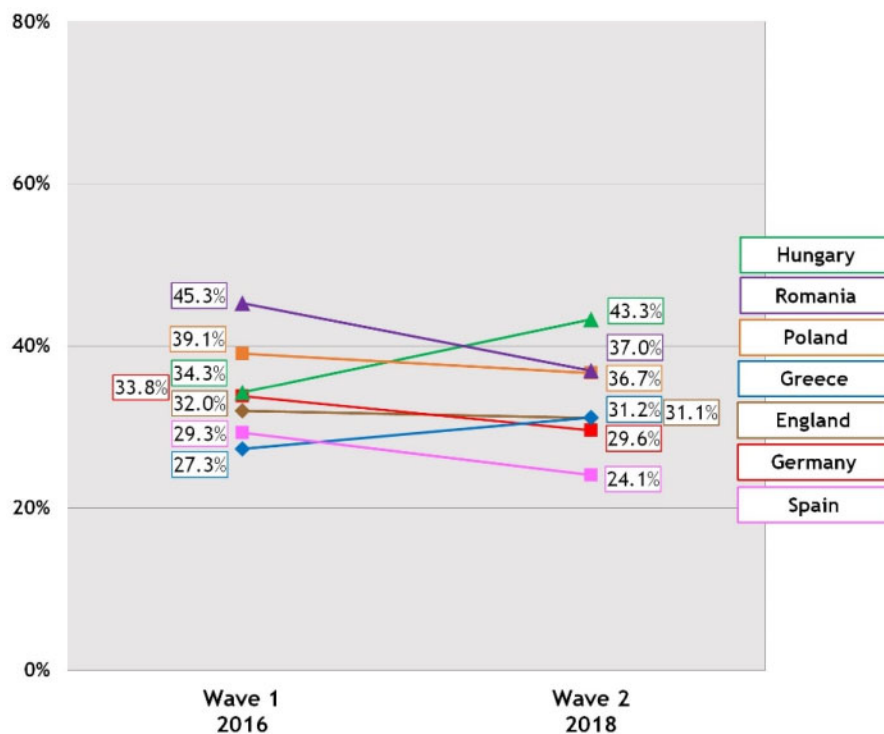

**Figure 4** Percentage of smokers<sup>†</sup> who would 'support' or 'strongly support' a law that bans fruit and candy flavours in ECs and e-liquid, by country and survey wave. <sup>a</sup>Among those who have heard of e-cigarettes

**Table 4** Factors associated with support for EC policies

|                                | Ban on EC use in smoke-free places | Restrictions on EC/e-liquid nicotine content | EC promotion ban        | EC flavour ban          |
|--------------------------------|------------------------------------|----------------------------------------------|-------------------------|-------------------------|
| Number of observations used    | 16 101                             | 16 099                                       | 16 040                  | 16 069                  |
| Number of individuals included | 12 869                             | 12 859                                       | 12 840                  | 12 846                  |
|                                | aOR (95% CI)                       | aOR (95% CI)                                 | aOR (95% CI)            | aOR (95% CI)            |
| Wave (year)                    |                                    |                                              |                         |                         |
| 1 (2016)                       | 0.94 (0.84–1.05)                   | <b>1.23 (1.11–1.38)</b>                      | 1.05 (0.94–1.19)        | 1.04 (0.92–1.17)        |
| 2 (2018)                       | 1.00                               | 1.00                                         | 1.00                    | 1.00                    |
| Country                        |                                    |                                              |                         |                         |
| Germany                        | 1.19 (0.96–1.48)                   | <b>0.76 (0.59–0.97)</b>                      | <b>1.42 (1.13–1.79)</b> | 1.03 (0.80–1.31)        |
| Greece                         | <b>1.32 (1.07–1.62)</b>            | 0.79 (0.62–1.02)                             | <b>1.43 (1.08–1.90)</b> | 0.90 (0.66–1.22)        |
| Hungary                        | 1.21 (0.94–1.55)                   | 1.29 (1.00–1.67)                             | <b>1.98 (1.53–2.56)</b> | <b>1.48 (1.15–1.90)</b> |
| Poland                         | <b>1.37 (1.09–1.72)</b>            | 1.20 (0.95–1.50)                             | <b>2.37 (1.91–2.94)</b> | <b>1.41 (1.11–1.79)</b> |
| Romania                        | 0.87 (0.70–1.08)                   | 0.82 (0.66–1.02)                             | <b>1.25 (1.00–1.55)</b> | <b>1.53 (1.24–1.89)</b> |
| Spain                          | <b>1.26 (1.02–1.56)</b>            | <b>1.24 (1.00–1.53)</b>                      | 1.09 (0.86–1.39)        | 0.86 (0.68–1.09)        |
| England                        | 1.00                               | 1.00                                         | 1.00                    | 1.00                    |
| Sex                            |                                    |                                              |                         |                         |
| Female                         | 0.96 (0.89–1.05)                   | <b>1.11 (1.02–1.20)</b>                      | <b>0.92 (0.85–1.00)</b> | <b>0.90 (0.83–0.99)</b> |
| Male                           | 1.00                               | 1.00                                         | 1.00                    | 1.00                    |
| Age group                      |                                    |                                              |                         |                         |
| 18–24                          | 0.94 (0.81–1.09)                   | 1.10 (0.95–1.27)                             | 1.07 (0.92–1.25)        | <b>0.72 (0.61–0.84)</b> |
| 25–39                          | 1.05 (0.93–1.18)                   | 1.12 (1.00–1.26)                             | 1.11 (0.99–1.24)        | <b>0.87 (0.77–0.98)</b> |
| 40–54                          | 1.00 (0.90–1.11)                   | 1.06 (0.96–1.17)                             | 1.02 (0.91–1.13)        | 0.94 (0.84–1.04)        |
| 55+                            | 1.00                               | 1.00                                         | 1.00                    | 1.00                    |
| Income                         |                                    |                                              |                         |                         |
| Low                            | 1.00                               | 1.00                                         | 1.00                    | 1.00                    |
| Medium                         | <b>1.17 (1.04–1.31)</b>            | 1.13 (1.00–1.27)                             | 1.11 (0.98–1.25)        | 1.08 (0.95–1.23)        |
| High                           | <b>1.33 (1.15–1.53)</b>            | 1.13 (0.98–1.31)                             | <b>1.25 (1.08–1.44)</b> | 1.05 (0.90–1.21)        |
| Not stated                     | <b>0.78 (0.66–0.91)</b>            | <b>0.74 (0.63–0.86)</b>                      | 0.90 (0.75–1.07)        | <b>0.80 (0.67–0.96)</b> |
| Education                      |                                    |                                              |                         |                         |
| Low                            | 1.00                               | 1.00                                         | 1.00                    | 1.00                    |
| Medium                         | 0.97 (0.88–1.08)                   | <b>1.14 (1.02–1.27)</b>                      | 0.98 (0.87–1.09)        | 0.98 (0.87–1.09)        |
| High                           | 1.10 (0.96–1.27)                   | <b>1.24 (1.08–1.42)</b>                      | 1.10 (0.95–1.27)        | 1.13 (0.97–1.30)        |
| Not stated                     | 0.78 (0.51–1.18)                   | 0.74 (0.48–1.13)                             | 0.71 (0.46–1.09)        | 0.86 (0.55–1.35)        |
| Smoking and EC use status      |                                    |                                              |                         |                         |
| Cigarette-only smoker          | 1.00                               | 1.00                                         | 1.00                    | 1.00                    |
| Dual user                      | <b>0.51 (0.45–0.58)</b>            | 0.98 (0.87–1.12)                             | <b>0.70 (0.61–0.80)</b> | <b>0.79 (0.69–0.91)</b> |
| EC-only user                   | <b>0.45 (0.28–0.71)</b>            | 0.73 (0.46–1.15)                             | <b>0.33 (0.18–0.58)</b> | <b>0.29 (0.16–0.53)</b> |
| Non-user                       | <b>1.65 (1.25–2.17)</b>            | <b>1.52 (1.17–1.98)</b>                      | <b>1.79 (1.37–2.32)</b> | <b>1.56 (1.20–2.02)</b> |

Bold font indicates a statistically significant difference from the baseline category ( $P < 0.05$ ).

aOR, adjusted odds ratio; CI, confidence interval.

Multivariable logistic regression models adjusted for country, wave, country  $\times$  wave interactions, sex, age, education, smoking status, and EC use status. Models also controlled for time in sample, results not shown for simplicity.

Missing values for outcome variables were not included, resulting in slight differences in number of observations used for each outcome.

EC promotion ban and EC flavour ban. Compared with smokers in England, those in Hungary, Greece, Germany and Romania were significantly more likely to support a ban on EC promotion; those in Hungary and Romania were more likely to support an EC flavour ban; and those in Greece and Spain were more likely to support a ban on EC use in smoke-free places. Compared with smokers in England, those in Germany were less likely to support restrictions on EC/e-liquid nicotine content, while those in Spain were more likely to support such restrictions.

Smokers with high income were significantly more likely to support a ban on EC use in smoke-free places and a ban on EC promotion compared with those with low income. No consistent patterns for associations between sex, age and education and support for each of the four EC policies were observed.

There was a clear pattern for associations between product use and EC policy support, such that support was highest among non-users, followed by cigarette-only smokers, dual users and lowest among EC-only users. Non-users were significantly more likely than cigarette-only smokers to support all four EC policies. In contrast, dual users were significantly less likely than cigarette-only smokers to support all EC policies except for restrictions on EC/e-liquid nicotine content. Similarly, EC-only users were significantly less likely than cigarette-only users to

support all EC policies except for restrictions on EC/e-liquid nicotine content.

There were no significant differences in support for EC policies from W1 to W2, except for a significant decrease in support for restrictions on EC nicotine content over this time period.

## Discussion

This study examined changes in support for EC policies among smokers in seven EU MS after the implementation of the TPD, including support for new regulations to restrict EC nicotine content required for all MS, and bans on EC use in smoke-free places, EC promotion and EC flavours that individual MS may consider within their own jurisdictions.

Overall, more than half of smokers (53.1% in 2016 and 54.6% in 2018) across all seven countries supported a ban on EC use in smoke-free places—which is higher than the level of support found in previous studies conducted in Spain (45.0% of general population in 2013–14)<sup>32</sup> and Great Britain (42.5% of smokers and ex-smokers in 2014),<sup>33</sup> but lower compared with Eurobarometer survey results (63.0% of smokers, ex-smokers and non-smokers across 28 EU MS in 2017).<sup>3</sup> We also found majority support (52.2% in 2016 and 47.4% in 2018) for restrictions on EC nicotine content. While overall support for a ban on EC promotion was lower at ~40.0% across

both survey waves in this study, it was still higher compared with support for an EC advertising ban among smokers and ex-smokers in Great Britain (20.6% in 2013 and 30.9% in 2014).<sup>33</sup> We found the lowest levels of support for a ban on EC flavours at ~30.0% at both waves across all countries, which is lower compared with Eurobarometer survey results (40.0% of smokers, ex-smokers and non-smokers across 28 EU MS in 2017).<sup>3</sup> Further research is needed to better understand variations in the level of support for EC policies found in this study compared with previous studies, which could be due to the differences in methodology, sample composition and other contextual factors.

No clear trends were observed for changes in policy support from 2016 to 2018. We found significant increases in support over time for bans on EC use in smoke-free places in Greece, and EC flavours in Hungary. In contrast, there was a significant decrease in support for a ban on EC use in smoke-places in Spain, and restrictions on EC nicotine content in England and Romania over the study period. Further longitudinal studies to monitor changes in support are warranted.

Support for all EC policies was generally higher among smokers in Poland, Hungary and Greece than those in England. These country-level differences in support may reflect differences in the overall EC regulatory environment and government position on e-cigarette use. In countries that promote ECs for smoking cessation, one might expect lower support for restrictive EC policies than in countries with a more cautious approach to use of ECs. High levels of support in Poland, Hungary and Greece may be due to the fact that these countries have more cautious positions on ECs and have implemented other measures that go beyond required TPD provisions. These include a comprehensive ban on EC advertising and additional taxation beyond VAT in Hungary and Poland; and a ban on EC use in public places in Greece, Hungary and Poland (see [table 1](#) for policy details). In contrast, England has not implemented any other regulations beyond TPD requirements. However, England has strict regulations to prevent exposure to EC advertising and to restrict access to these products among youth. There is also strong governmental support for the promotion of ECs for harm reduction in England which is endorsed by UK public health organizations<sup>6,34</sup> and aligns with the 2018 UK National Institute for Health Care Excellence guideline recommendation on use of ECs for smoking cessation.<sup>35</sup> Our findings suggest that differences in policy support across EU countries likely reflects government stance on ECs more broadly rather than a single dimension of 'restrictive' vs. 'less restrictive' policies per se.

Not surprisingly, we found that respondents who used ECs were less likely to support EC policies than non-users, which is consistent with findings of the 2017 Eurobarometer Survey conducted across 28 EU MS,<sup>3</sup> and previous studies in Great Britain,<sup>33</sup> the USA<sup>20,36</sup> and Spain.<sup>32</sup> We also found that cigarette smokers were less likely to support EC policies than ex-smokers, similar to results reported in studies in Great Britain,<sup>33</sup> Spain,<sup>32</sup> Hong Kong<sup>21</sup> and the USA.<sup>36</sup>

This study has some limitations. First, we were unable to assess pre-post changes in EC policy support in all seven countries. All EU MS were required to transpose most EC provisions of the TPD into their national legislation by 20 May 2016. In many countries, however, transposition and subsequent implementation of all EC provisions was delayed beyond deadlines specified in the TPD. There are also country differences with regards to their implementation of TPD provisions with transition periods. For example, some countries allowed for the sale of EC products produced before 20 November 2016 that were not in compliance with new restrictions on EC nicotine content until 20 May 2017. As a result of differences in TPD transposition and policy implementation dates at the country level, the ITC surveys (W1: June to September 2016; W2: February to May 2018) were not able to provide data for pre-post TPD evaluation of support for each of the four EC policies in all seven countries. Second, we only examined changes in support over

time for four EC policies. Future studies to assess support for a broader range of policies, such as health warnings on EC product packaging, EC advertising bans and EC taxation are warranted. Third, our sample was limited to cigarette smokers and EC users. Future research should assess support for EC policies among other groups, including those who have never smoked cigarettes or used ECs. However, the focus in the present study on support among smokers and EC users was justified since those individuals would be most directly affected by EC policies.

## Conclusions

In 2016 and 2018, about half of smokers in seven EU countries said that they would support a ban on EC use in smoke-free places and restrictions on nicotine content. There were no clear trends for changes in EC policy support over time in the seven countries, with support for some EC policies increasing over time in a few countries and decreasing in others. In general, the level of support for EC policies was lowest among smokers in England. Support for all EC policies was lower among those who used ECs and had low income. Future studies to explore how support for different EC policies may change as the policy landscape and evidence continues to evolve are needed.

## Acknowledgements

The authors gratefully acknowledge several members of the ITC Project team at the University of Waterloo for their assistance in all stages of conducting the ITC Surveys. In particular, we thank Thomas Agar (Project Manager of the EUREST-PLUS 6 European Countries Surveys), Janine Ouimet (Project Manager of the Wave 1 ITC Four Country Smoking and Vaping Survey), Nadia Martin (Project Manager of the Wave 2 ITC Four Country Smoking and Vaping Survey) and Anne C.K. Quah (ITC Managing Director and Senior Research Scientist). We also thank Genevieve Sansone (ITC Research Scientist) for her assistance with the preparation of figures. EUREST-PLUS Consortium members: European Network on Smoking and Tobacco Prevention (ENSP), Belgium: Constantine I. Vardavas, Andrea Glahn, Christina N. Kyriakos, Dominick Nguyen, Katerina Nikitara, Cornel Radu-Loghin and Polina Starchenko. University of Crete (UOC), Greece: Aristidis Tsatsakis, Charis Girvalaki, Chryssi Igoumenaki, Sophia Papadakis, Aikaterini Papatheanasi, Manolis Tzatzarakis and Alexander I. Vardavas. Kantar Public, Belgium: Nicolas Bécuwe, Lavinia Deaconu, Sophie Goudet, Christopher Hanley and Oscar Rivière. Smoking or Health Hungarian Foundation (SHHF), Hungary: Tibor Demjén, Judit Kiss and Anna Piroška Kovacs. Tobacco Control Unit, Catalan Institute of Oncology (ICO) and Bellvitge Biomedical Research Institute (IDIBELL), Catalonia: Esteve Fernández, Yolanda Castellano, Marcela Fu, Sarah O. Nogueira and Olena Tigova. King's College London (KCL), UK: Ann McNeill, Katherine East and, Sara C. Hitchman. Cancer Prevention Unit and WHO Collaborating Centre for Tobacco Control, German Cancer Research Center (DKFZ), Germany: Ute Mons and Sarah Kahnert. National and Kapodistrian University of Athens (UoA), Greece: Yannis Tountas, Panagiotis Behrakis, Filippou T. Filippidis, Christina Gratziou, Paraskevi Katsaounou, Theodosia Peleki, Ioanna Petroulia and Chara Tzavara. Aer Pur Romania, Romania: Antigona Carmen Trofor, Marius Eremia, Lucia Lotrean and Florin Mihaltan. European Respiratory Society (ERS), Switzerland: Gernot Rohde, Tamaki Asano, Claudia Cichon, Amy Far, Céline Genton, Melanie Jessner, Linnea Hedman, Christer Janson, Ann Lindberg, Beth Maguire, Sofia Ravara, Valérie Vaccaro and Brian Ward. Maastricht University, the Netherlands: Marc Willemsen, Hein de Vries, Karin Hummel and Gera E. Nagelhout. Health Promotion Foundation (HPF), Poland: Witold A. Zatoński, Aleksandra Herbeć, Kinga Janik-Konieczna, Krzysztof Przewoźniak



and Mateusz Zatoński. University of Waterloo (UW), Canada: Geoffrey T. Fong, Thomas K. Agar, Pete Driezen, Shannon Gravely, Anne C.K. Quah and Mary E. Thompson.

## Funding

The EUREST-PLUS project has received funding from the European Union's Horizon 2020 research and innovation programme under grant agreement No 681109 (C.I.V.) and the University of Waterloo (G.T.F.). The England arm of the ITC Four Country Smoking and Vaping Survey was supported by grants from the US National Cancer Institute (PO1 CA200512) and the Canadian Institutes of Health Research (FDN-148477). Additional support was provided to the University of Waterloo by a foundation grant from the Canadian Institutes of Health Research (FDN-148477). G.T.F. was supported by a Senior Investigator Grant from the Ontario Institute for Cancer Research. E.F. is partly supported by Ministry of Universities and Research, Government of Catalonia (2017SGR319) and by the Instituto Carlos III and co-funded by the European Regional Development Fund (FEDER) (INT16/00211 and INT17/00103), Government of Spain. E.F. thanks CERCA Programme Generalitat de Catalunya for the institutional support to IDIBELL.

**Conflicts of interest:** G.T.F. has served as an expert witness on behalf of governments in litigation involving the tobacco industry. K.P. reports grants and personal fees from the Polish League Against Cancer, outside the submitted work. A.M. is a UK National Institute for Health Research (NIHR) Senior Investigator. The views expressed in this article are those of the authors and not necessarily those of the NIHR or the UK Department of Health and Social Care. The funders had no role in the design of the study; in the collection, analyses, or interpretation of the data; in the writing of the manuscript; or in the decision to publish the results.

## Key points

- The 2016 European Tobacco Products Directive (TPD) requires new regulations for electronic cigarettes (ECs).
- This study assessed changes in support for EC policies from 2016 to 2018 (post-TPD) among adult smokers in seven European Union member states.
- About half of smokers in all seven countries supported a ban on EC use in smoke-free places and restrictions on EC nicotine content after TPD implementation. There were no clear trends in changes in policy support over time.

## References

- Wang M, Wang JW, Cao SS, et al. Cigarette smoking and electronic cigarettes use: a meta-analysis. *Int J Environ Res Public Health* 2016;13:120.
- Filippidis FT, Lavery AA, Gerovasili V, Vardavas CI. Two-year trends and predictors of e-cigarette use in 27 European Union member states. *Tob Control* 2017; 26:98–104.
- European Commission, European Union. Available at: <https://ec.europa.eu/comm frontoffice/publicopinion/index.cfm/Survey/getSurveyDetail/yearFrom/1974/yearTo/2017/surveyKy/2146>. (19 December 2019, date last accessed).
- Research and Markets. *Europe e-Cigarette and Vaporizer Device and Aftermarket. Vape Shop Analysis and Forecast, 2016–2022*. Dublin, Ireland: Research and Markets, 2017.
- National Academies of Sciences, Engineering and Medicine. *Public Health Consequences of e-Cigarettes*. Washington, DC: The National Academies Press, 2018.
- McNeill A, Brose LS, Calder R, et al. Evidence review of e-cigarettes and heated tobacco products 2018. *A Report Commissioned by Public Health England*. London: Public Health England, 2018.
- Glasser AM, Collins L, Pearson JL, et al. Overview of electronic nicotine delivery systems: a systematic review. *Am J Prev Med* 2017;52:e33–66.
- Huang SJ, Xu YM, Lau A. Electronic cigarette: a recent update of its toxic effects on humans. *J Cell Physiol* 2018;233:4466–78.
- Girvalaki C, Tzatzarakis M, Kyriakos CN, et al. Composition and chemical health hazards of the most common electronic cigarette liquids in nine European countries. *Inhal Toxicol* 2018;30:361–9.
- Hajek P, Phillips-Waller A, Przulj D, et al. A randomized trial of e-cigarettes versus nicotine-replacement therapy. *N Engl J Med* 2019;380:629–37.
- Weaver SR, Huang J, Pechacek TF, et al. Are electronic nicotine delivery systems helping cigarette smokers quit? Evidence from a prospective cohort study of U.S. adult smokers. *PLoS One* 2018;13:e0198047.
- Fairchild AL, Bayer R, Colgrove J. The renormalization of smoking? E-Cigarettes and the tobacco “endgame”. *N Engl J Med* 2014;370:293–5.
- Kennedy RD, Awopegba A, De León E, Cohen JE. Global approaches to regulating electronic cigarettes. *Tob Control* 2017;26:440–5.
- Gravely S, Driezen P, Ouimet J, et al. Prevalence of awareness, ever-use and current use of nicotine vaping products (NVPs) among adult current smokers and ex-smokers in 14 countries with differing regulations on sales and marketing of NVPs: cross-sectional findings from the ITC Project. *Addiction* 2019;114:1060–73.
- Institute for Global Tobacco Control, Johns Hopkins Bloomberg School of Public Health, Baltimore, MD. Available at: [https://www.globaltobaccocontrol.org/e-cigarette\\_policyscan](https://www.globaltobaccocontrol.org/e-cigarette_policyscan) (12 February 2020, date last accessed).
- European Parliament and the Council of European Union. Directive 2014/40/EU of the European Parliament and of the Council of 3 April 2014 on the approximation of the laws, regulations and administrative provisions of the Member States concerning the manufacture, presentation and sale of tobacco and related pr, 2014.
- Wilson N, Thomson GW, Edwards R, Blakely T. Potential advantages and disadvantages of an endgame strategy: a ‘sinking lid’ on tobacco supply. *Tob Control* 2013;22:i18–21.
- Arnott D, Dockrell M, Sandford A, Willmore I. Comprehensive smoke-free legislation in England: how advocacy won the day. *Tob Control* 2007;16:423–8.
- Chung-Hall J, Fong GT, Driezen P, Craig L. Smokers’ support for tobacco endgame measures in Canada: findings from the 2016 International Tobacco Control Smoking and Vaping Survey. *CMAJ* 2018;6:E412–22.
- Wackowski OA, Delnevo CD. Smokers’ attitudes and support for e-cigarette policies and regulation in the USA. *Tob Control* 2015;24:543–6.
- Cheung YTD, Wang MP, Ho SY, et al. Public support for electronic cigarette regulation in Hong Kong: a population-based cross-sectional study. *Int J Environ Res Public Health* 2017;14: 709.
- Vardavas C, Bécuwe N, Demjén T, et al. Study protocol of EUREST-PLUS - European regulatory science on tobacco: policy implementation to reduce lung disease. *Tob Induc Dis* 2018;16: 2.
- Fong GT, Thompson M, Boudreau C, et al. The conceptual model and methods of Wave 1 (2016) of the EUREST-PLUS ITC 6 European countries survey. *Tob Induc Dis* 2018;16:3.
- Fong GT, Cummings KM, Borland R, et al. The conceptual framework of the International Tobacco Control (ITC) Policy Evaluation Project. *Tob Control* 2006; 15:iii3–11.
- International Tobacco Control (ITC) Evaluation Project Surveys, Waterloo, Canada. Available at: <http://www.itcproject.org/surveys> (11 November 2019, date last accessed).
- Thompson M, Driezen P, Boudreau C, et al. Methods of the International Tobacco Control (ITC) EUREST-PLUS ITC Europe Surveys. *Eur J Public Health* 2020;30: iii4–9.
- ITC Project. ITC 6 European Country Wave 1 (2016) Technical Report. Waterloo, Canada; Brussels, Belgium, 2017.
- ITC Project. ITC 6 European Country Wave 2 Technical Report. Waterloo, Canada; Brussels, Belgium, 2019.

- 29 ITC Project. ITC Four Country Smoking and Vaping Survey, Wave 1 (4CV1) Technical Report. Waterloo, Canada, 2018.
- 30 Liang KY, Zeger S. Longitudinal data analysis using generalized linear models. *Biometrika* 1986;73:13–22.
- 31 Muller CJ, Maclehorse RF. Estimating predicted probabilities from logistic regression: different methods correspond to different target populations. *Int J Epidemiol* 2014;43:962–70.
- 32 Martínez-Sánchez JM, Ballbè M, Fu M, et al. Attitudes towards electronic cigarettes regulation in indoor workplaces and selected public and private places: a population-based cross-sectional study. *PLoS One* 2014;9:e114256.
- 33 Brose LS, Partos TR, Hitchman SC, McNeill A. Support for e-cigarette policies: a survey of smokers and ex-smokers in Great Britain. *Tob Control* 2017; 26:e7–15.
- 34 Royal College of Physicians. Nicotine Without Smoke: Tobacco Harm Reduction. London: RCP, 2016.
- 35 National Institute for Health and Care Excellence. Stop Smoking Interventions and Services. NICE Guideline (NG92). London: NICE, 2018.
- 36 Mello S, Bigman CA, Sanders-Jackson A, Tan A. Perceived harm of secondhand electronic cigarette vapors and policy support to restrict public vaping: results from a national survey of US adults. *Nicotine Tob Res* 2016;18:686–93.
